# Supplementary material for: Personal genome testing on physicians improves attitudes on pharmacogenomic approaches
Source: PubMed Central journal article supplement (PMC6438681; doi:10.1371/journal.pone.0213860), 2019-03-28

## DoctorSeq Project: 사전설문지

본 설문지는 의사들을 대상으로 약물관련 유전체 검사 전후의 인식 변화를 확인하고자 설계되었습니다. 선생님께서 동의서와 함께 제출하신 혈액은 엑솜시퀀싱 (Whole exome sequencing)을 수행하였으며, 이 데이터를 이용하여 약물 관련 유전변이 분석을 진행하였습니다.

본 설문은 약물 관련 유전변이 분석 보고서를 드리기 전에 시행하는 1차 설문이며, 이 설문을 완료하시면 선생님께 선생님의 약물 관련 유전자의 변이 분석을 통한 약물 안전성 예측 결과 보고서를 제공해드리게 됩니다. 보고서를 받으신 후 약 2주 후에 다시 2차 설문 연구가 진행되어 보고서를 받아 보신 후의 인식 변화를 확인하게 됩니다.

본 설문은 총 35문항으로 소요시간은 약 20분입니다. 선생님께서 응답하신 내용은 모두 익명으로 처리됩니다.

\* Required

### 사전-사후 설문 비교를 위한 ID 매칭 절차

1. 사전-사후 설문 결과의 변화를 추적하기 위해 ID 매칭 작업이 필요합니다. 핸드폰 번호를 기입해 주십시오. 이 번호는 설문지 매칭 작업 이외에는 사용되지 않습니다. \*

---

### 기본정보

2. 당신의 성별은 무엇입니까? \*

Mark only one oval.

- 남성  
 여성

3. 당신의 나이는 어느 범위에 있습니까? \*

Mark only one oval.

- 20대  
 30-39세  
 40-49세  
 50-59세  
 60세 이상

**4. 당신의 수련정도는 어느 단계입니까?**

최종 수련단계에 가까운 한개의 타원형에만 표시하십시오.

*Mark only one oval.*

- 의과대학 졸업
- 인턴수료
- 전문의
- 임상강사 혹은 펠로우쉽 이상
- 부교수 이상
- Other: \_\_\_\_\_

**5. 당신의 현재 근무지는 어디입니까?**

*Mark only one oval.*

- 대학 혹은 의과대학
- 3차병원 혹은 대학병원
- 2차병원 (30-99병상)
- 의원 혹은 개인병원
- 연구소
- 회사
- Other: \_\_\_\_\_

**6. 당신의 현재 근무지역은 어디입니까?**

*Mark only one oval.*

- 서울
- 경기도
- 강원도
- 충청도
- 경상도
- 전라도
- 제주도
- Other: \_\_\_\_\_

## 7. 당신의 전문과목은 무엇입니까?

Mark only one oval.

- 가정의학과  
 내과  
 마취통증의학과  
 방사선종양학과  
 병리과  
 비뇨기과  
 산부인과  
 산업의학과  
 신경과  
 신경외과  
 성형외과  
 소아청소년과  
 안과  
 이비인후과  
 예방의학과  
 응급의학과  
 영상의학과  
 외과  
 정신건강의학과  
 정형외과  
 재활의학과  
 진단검사의학과  
 피부과  
 흉부외과  
 핵의학과  
 Other: \_\_\_\_\_

## 일반적 건강 상태 조사

## 8. 현재 앓고 계시거나 이전에 진단받은 적이 있는 질환에 모두 표시해주세요.

*Check all that apply.*

- 뇌졸중
- 협심증 등 심장질환
- 고혈압
- 고지혈증
- 당뇨병
- 폐결핵
- 만성 기관지염 등 폐질환
- 암
- 자가면역성질환
- 알러지
- 지방간, 간염, 간경화 등 간질환
- 갑상성관련 질환
- 골다공증 등 뼈 관련 질환
- 없음
- Other: \_\_\_\_\_

## 9. 전신 마취를 동반한 수술을 받으신 적이 있습니까?

*Mark only one oval.*

- 예
- 아니오

## 약물 부작용 경험에 관한 조사

## 10. 현재 매일 1회 이상, 3개월 이상 꾸준히 복용해오신 약이 있습니까?

*Mark only one oval.*

- 예, 있습니다.
- 아니오, 없습니다.

## 11. 3개월 이상 꾸준히 복용하는 처방약이 있으시다면, 해당 약을 복용하면서 부작용을 경험한 적이 있습니까?

*Mark only one oval.*

- 예, 부작용을 경험한 적이 있습니다.
- 아니오, 부작용을 경험한 적이 없습니다.
- 꾸준히 복용하는 약이 없습니다.

## 12. 지난 일주일동안 한번이라도 약을 복용하신 적이 있습니까? (처방약과 일반약 모두 포함)

*Mark only one oval.*

- 예, 있습니다.
- 아니오, 없습니다.

13. 지난 일주일동안 한번이라도 약을 복용하셨다면, 그 약의 이름을 기억나는대로 써주십시오.

---



---



---



---



---

14. 현재까지 한번이라도 약물 부작용을 경험하신 적이 있습니까?

Mark only one oval.

- 예, 약물 부작용을 경험한 적이 있습니다.
- 아니오, 약물 부작용을 경험한 적이 없습니다.
- 약을 먹어본 적이 없습니다.
- Other: \_\_\_\_\_

15. 한번이라도 약물 부작용을 경험하셨다면, 그 부작용 정도는 어느 정도 였습니까?

Mark only one oval.

|                  |                       |                       |                       |                       |                       |                                |
|------------------|-----------------------|-----------------------|-----------------------|-----------------------|-----------------------|--------------------------------|
|                  | 1                     | 2                     | 3                     | 4                     | 5                     |                                |
| 일시적이며 가벼운<br>부작용 | <input type="radio"/> | <input type="radio"/> | <input type="radio"/> | <input type="radio"/> | <input type="radio"/> | 매우 심각해서 즉각적으로 약을<br>바꿔야 하는 부작용 |

16. 약물 부작용을 경험한 적이 있다면, 그 약물과 부작용을 생각하시는대로 써 주십시오. (예, 부루펜-속쓰림, augmentin-urticaria..)

---



---



---



---



---

### 처방 약물의 예상 부작용에 관한 설문조사

17. 환자가 처음 복용하는 약물의 경우, 약물 부작용 발생 가능성을 환자에게 어느 정도 자주 설명하십니까?

Mark only one oval.

|              |                       |                       |                       |                       |          |
|--------------|-----------------------|-----------------------|-----------------------|-----------------------|----------|
|              | 1                     | 2                     | 3                     | 4                     |          |
| 거의 설명하지 않는다. | <input type="radio"/> | <input type="radio"/> | <input type="radio"/> | <input type="radio"/> | 항상 설명한다. |

## 18. 위의 답변에서 약물 부작용 발생 가능성을 설명하지 않는 경우, 그 주된 이유는 무엇입니까?

*Check all that apply.*

- 예측되는 약물 부작용이 경미하기 때문
- 약물 부작용 발생 가능성이 매우 낮기 때문
- 약물 부작용 예측이 불가능하기 때문
- 약물 부작용이 발생하더라도 대체 약물이 없기 때문
- 환자가 약물 순응도를 떨어뜨릴 수 있기 때문
- 진료시간이 촉박해서 설명할 시간이 부족하기 때문
- Other: \_\_\_\_\_

## 19. 소화불량이나 가려움증 등의 경미한 경우부터 입원 및 사망에 이르는 심각한 경우까지, 다양한 수준의 약물 부작용을 고려했을때, 선생님께서 처방하셨던 환자 중, 얼마나 많은 환자가 약물 부작용을 경험했을 것이라고 생각하십니까?

(환자가 보고한 경우만 포함하지마시고, 예측한 수준을 표시해주세요.)

*Mark only one oval.*

- 5% 미만
- 5~10%
- 10~20%
- 20~30%
- 30~50%
- 50% 이상
- Other: \_\_\_\_\_

## 20. 약물 부작용 중 부작용으로 입원을 고려해야 하거나 장애 혹은 사망을 일으키는 심각한 부작용 (Severe ADR) 만 고려했을때, 선생님께서 처방하셨던 환자 중, 얼마나 많은 환자가 심각한 약물 부작용을 경험했을 것이라고 생각하십니까?

*Mark only one oval.*

- 0.1% 미만
- 0.1~0.5%
- 0.5~1%
- 1~5%
- 5~10%
- 10~20%
- 20~30%
- 30% 이상
- Other: \_\_\_\_\_

21. 약물 부작용에 관여하는 여러가지 요인들 (나이, 성별, 키/체중, 질병상태, 유전적 소인, 약물 상호작용 등) 중에서, 유전적 소인으로 인한 경우가 약물 부작용에서 차지하는 비중은 어느 정도로 예상하십니까?

Mark only one oval.

- 5% 미만
- 5~10%
- 10~20%
- 20~30%
- 30~50%
- 50~70%
- 70% 이상
- Other: \_\_\_\_\_

22. 약물 부작용에 관여하는 여러가지 요인들 (나이, 성별, 키/체중, 질병상태, 유전적 소인, 약물 상호작용 등) 중에서, 유전적 소인으로 인한 경우가 약물 부작용에서 차지하는 비중은 어느 정도로 예상하십니까? 이때 약물 부작용은 매우 심각한 경우 (입원, 장애, 사망을 초래하는)에 한정해서 응답해주시시오.

Mark only one oval.

- 5% 미만
- 5~10%
- 10~20%
- 20~30%
- 30~50%
- 50~70%
- 70% 이상
- Other: \_\_\_\_\_

23. 환자에게 약을 처방할 때, 특별히 약물 부작용에 대해 주의할 필요가 있다고 생각하는 약물이 있습니까?

Mark only one oval.

- 예, 있습니다.
- 아니오, 없습니다.
- Other: \_\_\_\_\_

24. 처방시 주의할 필요가 있다고 생각하시는 약물은 무엇입니까? 약물과 부작용을 같이 써 주십시오. (약물-부작용)

---



---



---



---



---

25. 선생님께서 처방했던 약물 중, 환자들이 가장 부작용을 많이 호소하는 약물은 무엇입니까? (환자들이 가장 많이 부작용을 보고했던 약물) 약물과 부작용을 같이 써 주십시오. (예: 아스피린-명)
- 

26. 선생님께서 처방했던 약물 중, 환자들이 두번째로 부작용을 많이 호소했던 약물은 무엇입니까? 약물과 부작용을 같이 써 주십시오.
- 

27. 선생님께서 처방했던 약물 중, 환자들이 세번째로 부작용을 많이 호소했던 약물은 무엇입니까? 약물과 부작용을 같이 써 주십시오.
- 

## 유전체 검사에 대한 인식 및 경험에 관하여

28. 선생님께서는 환자에게 직접 유전체 검사를 처방해보신적이 있습니까?

Mark only one oval.

- 예, 처방해보았습니다.  
 아니오, 아직까지 처방하지 않았습니다.

29. 유전체 검사를 처방해보셨던 경우에 어떤 용도로 활용하기 위해 처방하셨습니다?

Check all that apply.

- 암유전체 검사  
 희귀 질환 진단 및 치료  
 산전진단  
 질병위험도 예측 및 건강관리  
 약물 유전체  
 처방해보지 않음  
 Other: \_\_\_\_\_

30. 유전체 검사를 처방하셨을때, 검사에 대한 정보는 어떤 경로로 얻으셨습니까?

Check all that apply.

- 학부/대학원 교육  
 학회 또는 보수교육  
 선배 혹은 동료의사  
 제약회사  
 진단검사 수탁기관  
 약전 혹은 약품정보서적 및 웹사이트  
 Pubmed 등을 통한 논문 정보  
 처방해보지 않음  
 Other: \_\_\_\_\_



31. 선생님께서 생각하시는 유전체 검사의 목적별 중요도를 알아보고자 합니다. 다음 각 분야에서 유전체 검사의 중요성은 어느 정도 된다고 생각하십니까?

Mark only one oval per row.

|                 | 전혀 중요하지<br>않다.        | 약간 중요<br>하다.          | 보통이<br>다.             | 상당히 중요<br>하다.         | 매우 중요<br>하다.          |
|-----------------|-----------------------|-----------------------|-----------------------|-----------------------|-----------------------|
| 암의 진단 및 항암치료    | <input type="radio"/> | <input type="radio"/> | <input type="radio"/> | <input type="radio"/> | <input type="radio"/> |
| 희귀질환 진단 및 치료    | <input type="radio"/> | <input type="radio"/> | <input type="radio"/> | <input type="radio"/> | <input type="radio"/> |
| 산전진단            | <input type="radio"/> | <input type="radio"/> | <input type="radio"/> | <input type="radio"/> | <input type="radio"/> |
| 질병위험도 예측 및 건강관리 | <input type="radio"/> | <input type="radio"/> | <input type="radio"/> | <input type="radio"/> | <input type="radio"/> |
| 맞춤형 약물 치료       | <input type="radio"/> | <input type="radio"/> | <input type="radio"/> | <input type="radio"/> | <input type="radio"/> |

### 약물 유전체 검사에 대한 인식 및 경험에 관하여

32. 약물 유전체 검사 결과를 진료에 활용하기 위해 환자에게 처방하신 경험이 있습니까? (암 맞춤요법의 경우 포함)

Mark only one oval.

- 예, 있습니다.
- 아니오, 없습니다.

33. 약물 유전체 검사를 환자에게 처방하신 적이 있다면, 그 세부 목적은 무엇이었습니다?

Check all that apply.

- 항암제 맞춤요법
- 신약 후보 물질 발굴
- 약물 적정 용량 예측
- 약물 유해반응 예방
- 임상시험 효율 증대
- 처방경험 없음
- Other: \_\_\_\_\_

34. 선생님께서는 추후 약물 유전체 검사를 진료 및 연구에 활용할 것을 어느 정도나 고려하고 계십니까?

Mark only one oval.

|                |                       |                       |                       |                       |                       |                |
|----------------|-----------------------|-----------------------|-----------------------|-----------------------|-----------------------|----------------|
|                | 1                     | 2                     | 3                     | 4                     | 5                     |                |
| 전혀 고려하고 있지 않다. | <input type="radio"/> | <input type="radio"/> | <input type="radio"/> | <input type="radio"/> | <input type="radio"/> | 적극적으로 고려하고 있다. |

35. 만약 약물 유전체 검사를 진료 및 연구에 활용할 계획이시라면, 어느 정도 시점에서 가능할 것으로 예상하십니까?

Mark only one oval.

- 1년 이내
- 1~2년 사이
- 2~3년 사이
- 3~5년 사이
- 5년 이후

36. 약물 유전체 검사를 진료 및 연구에 활용하기에 앞서 가장 큰 장애물이라고 생각되는 것을 3가지만 선택해주시오.

Check all that apply.

- 검사로부터 이득을 얻는 환자수가 적음
- 진료에 사용할 학술적 근거가 부족함
- 처방하는 의료인들의 유전체 지식이 충분하지 않음
- 규제 및 보험 수가 등 제도적 뒷받침이 부족
- 의료기관의 유전체 검사를 위한 인프라 구축 미비
- 환자에게 검사의 당위성을 설명하기가 어려움
- Other: \_\_\_\_\_

### 약물 유전체 검사 처방 행태와 비용에 관하여

37. 미국 FDA에서는 약물과 유전변이의 관계에 대해 임상적 근거가 확립된 약물 150여개에 대해, 해당 약물 처방시 유전변이 정보를 고려하도록 권고하고 있습니다. 아래 약물은 그 중 일부 약과 부작용의 관계를 나타냅니다. 아래 쌍에 대해 해당 부작용을 예방하기 위해 약물별 유전체 검사를 처방한다고 할때, 환자 본인 부담 비용으로 가장 적당하다고 생각하는 비용은 어느 정도입니까?

Mark only one oval per row.

|                                                  | 1만원 이하                | 1~5만원                 | 5~10만원                | 10~30만원               | 30만원 이상               |
|--------------------------------------------------|-----------------------|-----------------------|-----------------------|-----------------------|-----------------------|
| Warfarin-Bleeding                                | <input type="radio"/> | <input type="radio"/> | <input type="radio"/> | <input type="radio"/> | <input type="radio"/> |
| Carbamazepine-SJS/TEN                            | <input type="radio"/> | <input type="radio"/> | <input type="radio"/> | <input type="radio"/> | <input type="radio"/> |
| Simvastatin-Myopathy                             | <input type="radio"/> | <input type="radio"/> | <input type="radio"/> | <input type="radio"/> | <input type="radio"/> |
| Clopidogrel-Myocardial Infarction, Death, Stroke | <input type="radio"/> | <input type="radio"/> | <input type="radio"/> | <input type="radio"/> | <input type="radio"/> |
| Valproic acid- Hyperammonia                      | <input type="radio"/> | <input type="radio"/> | <input type="radio"/> | <input type="radio"/> | <input type="radio"/> |

38. 본 연구의 약물 유전체 분석은 전장 엑솜 시퀀싱을 통해 얻어진 데이터를 활용하여 모든 약물의 약물 관련 유전자에 발생한 개인 유전 변이 계산을 통한 개인별 위험도 예측 결과를 제공합니다. 이 검사를 환자에게 적용한다면, 환자 본인 부담 비용은 어느 정도가 적절할 것으로 생각하십니까? (엑솜시퀀싱 비용 포함)

Mark only one oval.

- 5만원 이하
- 5~10만원
- 10~30만원
- 30~50만원
- 50~100만원
- 100만원 이상
- Other: \_\_\_\_\_

39. 약물 유전체 분석을 통한 약물 부작용 예측에서 가장 관심있게 보시는 약물(군)의 ATC 클래스는 어떤 것입니까?

Check all that apply.

- A: 소화관 및 대사
- B: 혈액 및 조혈기관
- C: 심혈관계
- D: 피부과
- G: 비뇨 생식기계 및 호르몬
- H: 성호르몬 및 인슐린을 제외한 전신성 호르몬 제제
- J: 전신작용 항감염제
- L: 항종양제 및 면역 조절제
- M: 근골격계
- N: 신경계
- P: 구충제, 살충제 및 기피제
- R: 호흡기계
- S: 감각기관
- V:기타

40. 선생님께서는 약물 유전체 검사를 통해 특정 약물의 위험도가 높다는 것을 알게 되신다면, 그 대체 약물로 처방을 변경하시겠습니까?

Mark only one oval.

- 예, 처방을 변경하겠습니다.
- 아니오. 처방을 변경하지 않겠습니다.
- 모르겠습니다.
- Other: \_\_\_\_\_

41. 선생님께서는 환자가 아닌 가족에게 유전체 분석을 이용한 약물 부작용 예측 검사를 권고하시겠습니까?

Mark only one oval.

- 예, 권고하겠습니다.
- 아니오, 권고하지 않겠습니다.

42. 위의 질문에서 가족에게 유전체 분석을 통한 약물 부작용 예측 검사를 권고하지 않으시겠다고 답하신 경우, 그 이유는 무엇입니까?

---



---



---



---



---

**설문에 응답해주셔서 감사합니다.**

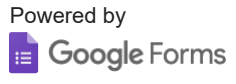

Supplement: pone.0213860.s005.pdf [file pone.0213860.s005.pdf]
